# Supplementary material
Source: MDPI journal article supplement (https://www.mdpi.com/2071-1050/10/12/4528)
Supplement: s1 [file s1]

## Sheet: Appendix A
		u1			u2			u3			u4			u5			u6			u7			u8			u9			u10			u11			u12			u13			u14			u15			u16
		f1	f2	f3	f1	f2	f3	f1	f2	f3	f1	f2	f3	f1	f2	f3	f1	f2	f3	f1	f2	f3	f1	f2	f3	f1	f2	f3	f1	f2	f3	f1	f2	f3	f1	f2	f3	f1	f2	f3	f1	f2	f3	f1	f2	f3	f1	f2	f3
e1	A1	3	5	3	4	4	3	2	4	3	2	2	4	3	5	3	5	3	1	4	5	2	3	1	4	4	2	3	2	1	5	3	3	4	5	3	5	4	5	5	3	3	5	1	4	2	5	1	2
	A2	5	5	3	3	2	4	3	3	4	2	3	2	1	3	5	3	3	4	2	2	5	1	4	3	5	2	4	2	1	4	5	3	4	4	2	3	3	5	1	5	1	4	3	3	4	1	5	4
	A3	1	4	4	2	2	3	4	4	3	4	4	5	1	5	4	5	4	4	5	5	4	5	5	2	4	4	3	4	3	3	3	4	4	4	4	1	1	4	5	5	4	1	1	5	5	2	4	5
	Probability	0.2	0.3	0.5	0.15	0.25	0.6	0.25	0.45	0.3	0.35	0.35	0.3	0.25	0.4	0.35	0.35	0.35	0.3	0.4	0.3	0.3	0.35	0.35	0.3	0.3	0.5	0.2	0.35	0.35	0.3	0.4	0.3	0.3	0.3	0.5	0.2	0.3	0.35	0.35	0.25	0.3	0.35	0.2	0.45	0.35	0.5	0.3	0.2
e2	A1	3	4	2	4	2	5	1	3	3	2	3	2	2	4	2	2	3	3	2	3	4	1	3	4	2	3	2	3	4	4	4	4	3	3	2	5	5	5	1	4	5	2	5	5	2	4	3	1
	A2	2	4	1	1	3	2	2	3	5	4	3	2	2	3	2	2	4	4	2	4	4	1	2	4	4	4	3	4	4	2	3	3	2	3	3	4	2	3	4	5	3	4	3	4	3	2	4	1
	A3	4	2	1	2	1	4	1	3	4	2	1	2	4	3	2	1	2	3	3	4	4	2	5	3	2	2	2	3	3	1	2	3	3	3	4	2	5	4	4	4	5	4	2	5	5	3	5	5
	Probability	0.2	0.4	0.4	0.2	0.3	0.5	0.25	0.3	0.35	0.2	0.3	0.5	0.4	0.3	0.3	0.25	0.4	0.35	0.25	0.4	0.35	0.35	0.35	0.3	0.4	0.3	0.3	0.3	0.5	0.2	0.4	0.3	0.3	0.25	0.4	0.35	0.2	0.45	0.35	0.3	0.5	0.2	0.5	0.3	0.2	0.2	0.45	0.35
e3	A1	1	5	1	3	2	3	4	3	3	5	4	4	4	5	2	1	1	5	3	2	4	3	3	4	4	2	2	3	1	5	1	2	5	4	4	5	2	3	3	2	3	4	3	3	3	4	3	4
	A2	3	5	2	3	4	1	4	4	2	3	4	5	2	5	4	4	4	4	4	3	4	2	3	4	4	2	4	1	4	4	4	2	2	3	4	2	3	3	5	4	5	2	4	3	4	4	3	4
	A3	3	5	3	3	4	2	4	3	2	3	3	3	3	2	4	3	5	4	1	3	3	5	4	1	2	4	4	4	1	3	5	3	1	2	4	4	1	4	5	2	4	4	2	5	4	3	5	3
	Probability	0.3	0.4	0.3	0.4	0.3	0.3	0.3	0.5	0.2	0.3	0.3	0.4	0.25	0.4	0.35	0.15	0.25	0.6	0.3	0.3	0.4	0.4	0.3	0.3	0.35	0.35	0.3	0.4	0.3	0.3	0.3	0.5	0.2	0.2	0.45	0.35	0.3	0.5	0.2	0.5	0.3	0.2	0.5	0.3	0.2	0.2	0.45	0.35
		u1			u2			u3			u4			u5			u6			u7			u8			u9			u10			u11			u12			u13			u14			u15			u16
		f1	f2	f3	f1	f2	f3	f1	f2	f3	f1	f2	f3	f1	f2	f3	f1	f2	f3	f1	f2	f3	f1	f2	f3	f1	f2	f3	f1	f2	f3	f1	f2	f3	f1	f2	f3	f1	f2	f3	f1	f2	f3	f1	f2	f3	f1	f2	f3
e1	A1	60	35	39	39	23	65	62	70	95	18	24	75	78	56	34	42	56	65	56	78	82	36	56	56	18	36	55	36	35	54	58	54	78	41	78	76	58	35	18	36	78	78	15	35	35	18	35	56
	A2	35	55	21	23	58	23	39	59	59	34	29	56	56	18	22	19	35	59	42	56	56	75	36	61	20	56	61	55	35	34	55	36	55	18	40	58	56	56	35	18	56	80	35	50	75	36	56	76
	A3	62	21	61	36	18	75	39	37	54	40	18	53	16	35	62	23	56	78	41	81	94	62	75	90	36	78	79	30	76	75	36	75	55	40	55	55	36	57	55	56	78	80	18	56	35	35	58	55
	Probability	0.2	0.3	0.5	0.15	0.25	0.6	0.25	0.45	0.3	0.35	0.35	0.3	0.25	0.4	0.35	0.35	0.35	0.3	0.4	0.3	0.3	0.35	0.35	0.3	0.3	0.5	0.2	0.35	0.35	0.3	0.4	0.3	0.3	0.3	0.5	0.2	0.3	0.35	0.35	0.25	0.3	0.35	0.2	0.45	0.35	0.5	0.3	0.2
e2	A1	75	80	25	69	35	91	18	56	61	31	56	36	34	82	42	35	61	56	35	60	79	78	38	61	58	38	78	37	60	79	80	38	58	78	58	55	58	57	41	35	55	76	56	36	18	75	50	36
	A2	55	75	19	20	58	45	38	54	94	79	54	35	40	56	39	41	82	79	41	80	72	61	35	62	79	38	59	36	80	79	78	38	98	76	35	55	75	55	35	35	75	95	60	78	40	70	72	54
	A3	75	40	20	38	22	78	17	50	78	36	20	34	82	62	45	21	42	56	50	81	80	63	38	59	80	60	60	59	35	78	78	59	36	40	36	80	50	76	36	55	75	97	78	60	41	52	36	18
	Probability	0.2	0.4	0.4	0.2	0.3	0.5	0.25	0.3	0.35	0.2	0.3	0.5	0.4	0.3	0.3	0.25	0.4	0.35	0.25	0.4	0.35	0.35	0.35	0.3	0.4	0.3	0.3	0.3	0.5	0.2	0.4	0.3	0.3	0.25	0.4	0.35	0.2	0.45	0.35	0.3	0.5	0.2	0.5	0.3	0.2	0.2	0.45	0.35
e3	A1	45	76	56	38	62	82	38	54	56	55	90	18	16	61	41	40	56	82	60	56	95	58	36	78	79	80	35	39	58	75	58	36	18	35	18	36	75	36	35	55	78	90	56	35	20	76	75	55
	A2	70	29	22	40	88	78	56	22	95	74	36	56	16	42	56	56	78	99	35	52	75	76	61	58	91	76	58	39	74	76	56	35	35	56	41	18	76	30	50	35	56	78	60	61	36	81	58	38
	A3	70	19	56	41	43	38	40	53	75	76	55	94	34	62	84	35	56	91	42	78	80	76	36	57	58	76	34	70	35	55	78	55	38	56	78	58	50	30	55	36	80	80	81	55	50	90	76	58
	Probability	0.3	0.4	0.3	0.4	0.3	0.3	0.3	0.5	0.2	0.3	0.3	0.4	0.25	0.4	0.35	0.15	0.25	0.6	0.3	0.3	0.4	0.4	0.3	0.3	0.35	0.35	0.3	0.4	0.3	0.3	0.3	0.5	0.2	0.2	0.45	0.35	0.3	0.5	0.2	0.5	0.3	0.2	0.5	0.3	0.2	0.2	0.45	0.35
[truncated: 39 more columns]

## Sheet: Appendix B
criteria	a	b	c	d
u1	0.79	0.8467	0.94	0.98
u2	0.72	0.78	0.92	0.97
u3	0.4033	0.47	0.62	0.68
u4	0.4533	0.5333	0.6933	0.7567
u5	0.5867	0.6567	0.8067	0.8633
u6	0.6567	0.7233	0.8267	0.8733
u7	0.86	0.9133	0.96	0.99
u8	0.86	0.9133	0.96	0.99
u9	0.4033	0.47	0.62	0.68
u10	0.4533	0.5333	0.6933	0.7567
u11	0.4033	0.47	0.62	0.68
u12	0.86	0.9133	0.96	0.99
u13	0.4033	0.47	0.62	0.68
u14	0.27	0.3467	0.5067	0.5733
u15	0.5867	0.6567	0.8067	0.8633
u16	0.72	0.78	0.92	0.97
u17	0.4533	0.5333	0.6933	0.7567
u18	0.5867	0.6567	0.8067	0.8633
u19	0.93	0.98	0.98	1
u20	0.79	0.8467	0.94	0.98
u21	0.4033	0.47	0.62	0.68
u22	0.27	0.3467	0.5067	0.5733
u23	0.5867	0.6567	0.8067	0.8633
u24	0.93	0.98	0.98	1
u25	0.79	0.8467	0.94	0.98
u26	0.72	0.78	0.92	0.97
u27	0.86	0.9133	0.96	0.99
u28	0.72	0.78	0.92	0.97
u29	0.625	0.695	0.78	0.825

## Sheet: Appendix C
vj	a	b	c	d
v1	0.4911	0.5819	0.7985	0.893
v2	0.4271	0.5391	0.8388	0.97
v3	0.1478	0.2206	0.4118	0.5061
v4	0.2416	0.3313	0.5681	0.68
v5	0.3987	0.4995	0.7537	0.8633
v6	0.2054	0.2905	0.4851	0.58
v7	0.4516	0.5642	0.771	0.8677
v8	0.3637	0.4949	0.7359	0.8504
v9	0.1261	0.1887	0.3639	0.4516
v10	0.2716	0.3759	0.6353	0.7567
v11	0.2416	0.3313	0.5681	0.68
v12	0.5844	0.6947	0.897	0.99
v13	0.3033	0.3893	0.5869	0.68
v14	0.1835	0.2637	0.4734	0.5733
v15	0.2439	0.3182	0.5156	0.6052
v16	0.3365	0.4289	0.6576	0.7567
v17	0.3338	0.4153	0.6163	0.7317
v18	0.3941	0.466	0.6543	0.7713
v19	0.5637	0.6811	0.8097	0.888
v20	0.5864	0.6808	0.8915	0.98
v21	0.1884	0.2559	0.4453	0.5356
v22	0.1618	0.2443	0.4643	0.5733
v23	0.3086	0.4026	0.6523	0.7657
v24	0.5572	0.6907	0.898	1
v25	0.5307	0.6366	0.8682	0.9688
v26	0.4149	0.5288	0.8108	0.933
v27	0.5201	0.6183	0.7984	0.8811
v28	0.3234	0.4032	0.6393	0.7439
v29	0.4639	0.5589	0.7398	0.825
v1	0.5368	0.644	0.8783	0.98
v2	0.3388	0.4703	0.7847	0.9272
v3	0.2094	0.287	0.4922	0.5892
v4	0.2416	0.3313	0.5681	0.68
v5	0.3081	0.4057	0.6478	0.7567
v6	0.3448	0.4468	0.6639	0.7654
v7	0.5844	0.6947	0.897	0.99
v8	0.3069	0.4184	0.6428	0.7501
v9	0.2741	0.3575	0.5793	0.68
v10	0.1618	0.2443	0.4643	0.5733
v11	0.2416	0.3313	0.5681	0.68
v12	0.3188	0.4337	0.6449	0.7454
v13	0.2094	0.287	0.4922	0.5892
v14	0.1835	0.2637	0.4734	0.5733
v15	0.2742	0.3611	0.5766	0.6735
v16	0.2994	0.3779	0.588	0.68
v17	0.2742	0.3401	0.5215	0.6165
v18	0.3512	0.4098	0.559	0.6411
v19	0.632	0.7454	0.9157	1
v20	0.3692	0.4655	0.6719	0.7645
v21	0.2741	0.3575	0.5793	0.68
v22	0.1142	0.1878	0.3884	0.4925
v23	0.2704	0.3483	0.5752	0.6794
v24	0.3933	0.531	0.7512	0.859
v25	0.4101	0.517	0.7463	0.8491
v26	0.4912	0.5883	0.8576	0.97
v27	0.6384	0.7344	0.9105	0.99
v28	0.4912	0.5883	0.8576	0.97
v29	0.2921	0.3821	0.5575	0.6436
v1	0.3691	0.4609	0.6751	0.7719
v2	0.4271	0.5391	0.8388	0.97
v3	0.3033	0.3893	0.5869	0.68
v4	0.2716	0.3759	0.6353	0.7567
v5	0.3556	0.4564	0.6665	0.7667
v6	0.4462	0.5502	0.7724	0.8733
v7	0.4715	0.5677	0.7117	0.7912
v8	0.5152	0.6438	0.8796	0.99
v9	0.1884	0.2559	0.4453	0.5356
v10	0.1618	0.2443	0.4643	0.5733
v11	0.2416	0.3313	0.5681	0.68
v12	0.3188	0.4337	0.6449	0.7454
v13	0.2094	0.287	0.4922	0.5892
v14	0.1418	0.2142	0.4069	0.5025
v15	0.4355	0.528	0.7651	0.8633
v16	0.5344	0.6272	0.8726	0.97
v17	0.3081	0.3879	0.6194	0.7567
v18	0.3987	0.4776	0.7207	0.8633
v19	0.4345	0.5335	0.7038	0.7876
v20	0.3692	0.4655	0.6719	0.7645
v21	0.2741	0.3575	0.5793	0.68
v22	0.1439	0.2153	0.4152	0.5152
v23	0.4005	0.5139	0.7506	0.8633
v24	0.5572	0.6907	0.898	1
v25	0.594	0.7012	0.8898	0.98
v26	0.4149	0.5288	0.8108	0.933
v27	0.2394	0.3264	0.5014	0.5852
v28	0.3234	0.4032	0.6393	0.7439
v29	0.2921	0.3821	0.5575	0.6436
